# Supplementary material for: Patterned film growth of metal–organic frameworks based on galvanic displacement
Source: Royal Society of Chemistry journal article supplement (doi:10.1039/c001544j), 2010-01-01
Supplement: c001544j.pdf [file c001544j.pdf]

### Supporting Information

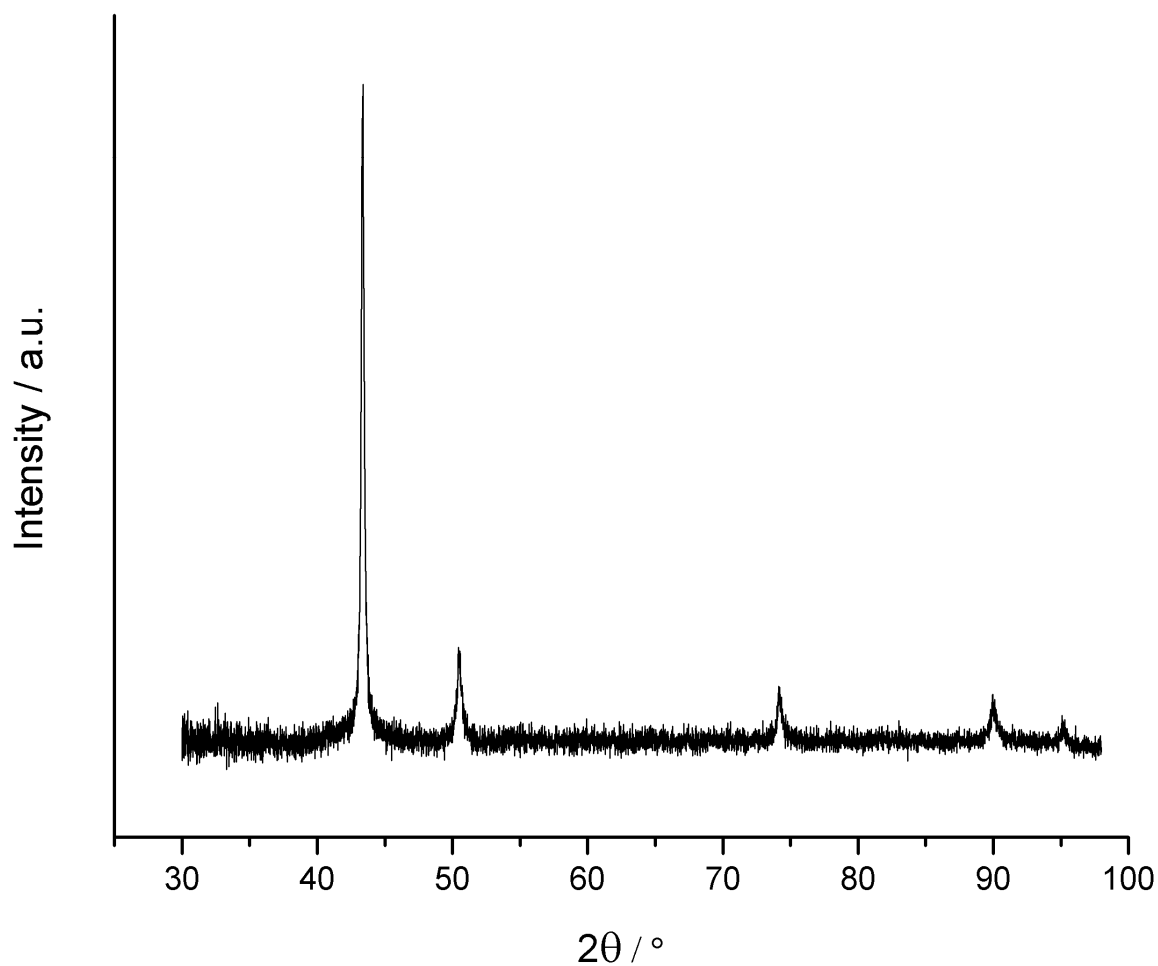

**Fig. S1** XRD reflection pattern of a sample coated with copper before applying the silver nitrate containing solution. Only metallic copper was detected; the absence of any oxides was confirmed.
